# Supplementary material for: Histidine-assisted synthesis of CeO2 nanoparticles for improving the catalytic performance of Pt-based catalysts in methanol electrooxidation
Source: Royal Society of Chemistry journal article supplement (doi:10.1039/c8nj03972k), 2018-01-01
Supplement: c8nj03972k1.pdf [file c8nj03972k1.pdf]

## Supporting Information

**Table S1** Physical properties of as-prepared CeO<sub>2</sub> and His-CeO<sub>2</sub>

| Sample               | Lattice parameter (Å) <sup>a</sup> | Size (nm) <sup>a</sup> |
|----------------------|------------------------------------|------------------------|
| CeO <sub>2</sub>     | 5.4                                | 10.65                  |
| His-CeO <sub>2</sub> | 5.42                               | 12.26                  |

<sup>a</sup> calculated from XRD.

**Table S2** The binding energies and relative content of Ce species in CeO<sub>2</sub> and His-CeO<sub>2</sub>

| Species | CeO <sub>2</sub>    |             | His-CeO <sub>2</sub> |             |
|---------|---------------------|-------------|----------------------|-------------|
|         | Binding energy (eV) | Content (%) | Binding energy (eV)  | Content (%) |
| Ce(IV)  | 882.2               |             | 882.2                |             |
| Ce(IV)  | 888.7               |             | 888.6                |             |
| Ce(IV)  | 898.3               | 83.07       | 898.1                | 80.24       |
| Ce(IV)  | 900.9               |             | 900.7                |             |
| Ce(IV)  | 907.9               |             | 907.6                |             |
| Ce(IV)  | 916.8               |             | 916.6                |             |
| Ce(III) | 884.9               | 16.93       | 884.7                | 19.76       |
| Ce(III) | 903.7               |             | 903.5                |             |

**Table S3** The loadings of Pt species determined by ICP-OES

| Catalysts                  | Pt (wt%) |
|----------------------------|----------|
| Pt/C-JM                    | 19.4     |
| Pt/C-Z                     | 18.3     |
| Pt/CeO <sub>2</sub> -C     | 18.7     |
| Pt/His-CeO <sub>2</sub> -C | 18.6     |

**Table S4** The relative content of Pt species in catalysts determined by XPS spectra

| Catalysts                  | Pt <sup>0</sup> (%) |
|----------------------------|---------------------|
| Pt/C-Z                     | 60.35               |
| Pt/CeO <sub>2</sub> -C     | 66.16               |
| Pt/His-CeO <sub>2</sub> -C | 67.87               |

**Table S5** The positive scan peak current density normalized as mass activity for Pt/His-CeO<sub>2</sub>-C and other recently reported catalysts

| Sample                                                     | Mass activity /<br>A g <sub>Pt</sub> <sup>-1</sup> | Scanning<br>Rate / mV S <sup>-1</sup> | Condition                                                          | References |
|------------------------------------------------------------|----------------------------------------------------|---------------------------------------|--------------------------------------------------------------------|------------|
| Pt/CeO <sub>2</sub> /graphene                              | 366                                                | 100                                   | 0.5 M H <sub>2</sub> SO <sub>4</sub> +<br>1 M CH <sub>3</sub> OH   | 1          |
| Pt/CeO <sub>2</sub> /PANI                                  | 361.3                                              | 100                                   | 0.5 M H <sub>2</sub> SO <sub>4</sub> +<br>0.5 M CH <sub>3</sub> OH | 2          |
| Pt/TiO <sub>2</sub> -C                                     | 102.8                                              | 50                                    | 0.5 M H <sub>2</sub> SO <sub>4</sub> +<br>0.5 M CH <sub>3</sub> OH | 3          |
| Pt-MoO <sub>x</sub> /CNTs                                  | 246.2                                              | 20                                    | 0.5 M H <sub>2</sub> SO <sub>4</sub> +<br>1 M CH <sub>3</sub> OH   | 4          |
| Pt/MnO <sub>x</sub> -<br>MWCNTs                            | 1367.3                                             | 50                                    | 0.5 M H <sub>2</sub> SO <sub>4</sub> +<br>1 M CH <sub>3</sub> OH   | 5          |
| Pt-SiO <sub>2</sub> /graphene                              | 1047                                               | 50                                    | 0.5 M H <sub>2</sub> SO <sub>4</sub> +<br>1 M CH <sub>3</sub> OH   | 6          |
| Pt/Ce <sub>0.7</sub> Mo <sub>0.3</sub> O <sub>2-δ</sub> -C | 1888.4                                             | 50                                    | 0.5 M H <sub>2</sub> SO <sub>4</sub> +<br>1 M CH <sub>3</sub> OH   | 7          |
| Pt/Ce <sub>0.8</sub> Sn <sub>0.2</sub> O <sub>2-δ</sub> -C | 502                                                | 50                                    | 0.5 M H <sub>2</sub> SO <sub>4</sub> +<br>0.5 M CH <sub>3</sub> OH | 8          |
| Pt/His-CeO <sub>2</sub> -C                                 | 1116.9                                             | 50                                    | 0.5 M H <sub>2</sub> SO <sub>4</sub> +<br>1 M CH <sub>3</sub> OH   | This work  |

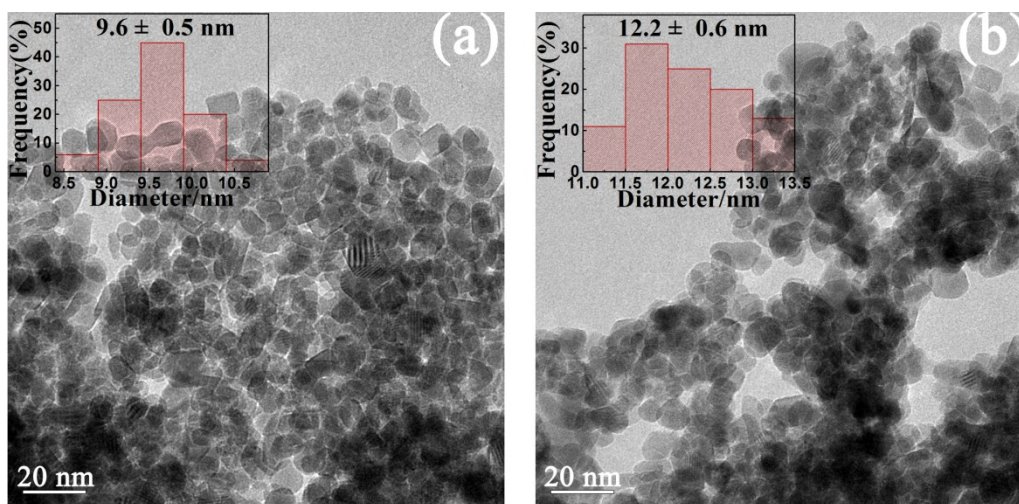

Fig. S1 TEM images of (a) CeO<sub>2</sub> and (b) His-CeO<sub>2</sub>, the scar bar is 20 nm.

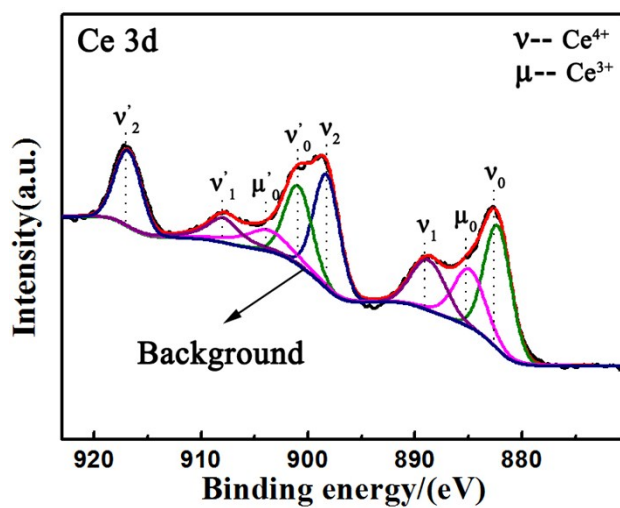

Fig. S2 XPS spectra for Ce 3d core level regions of CeO<sub>2</sub>.

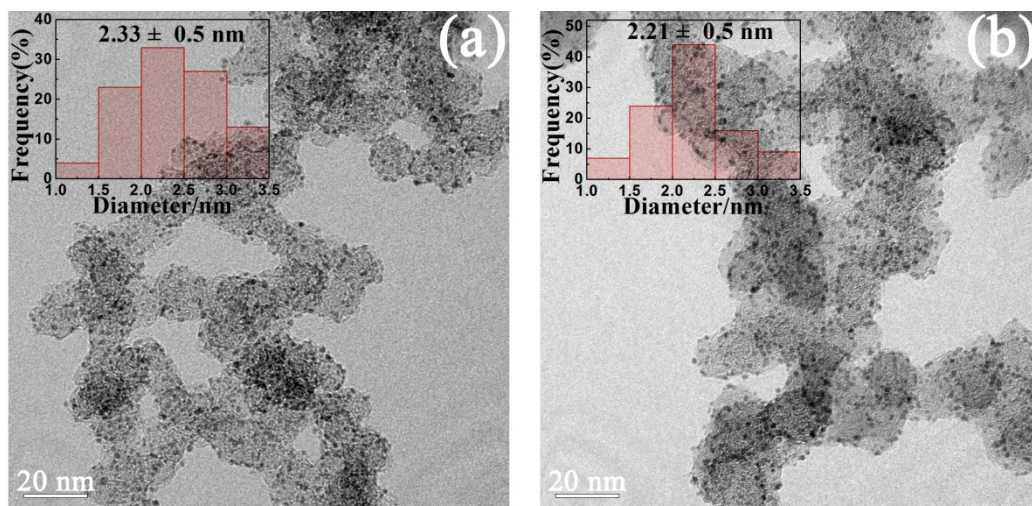

**Fig. S3** TEM images of (a) Pt/C-Z and (b) Pt/CeO<sub>2</sub>-C. Inserts are the size distribution of Pt NPs.

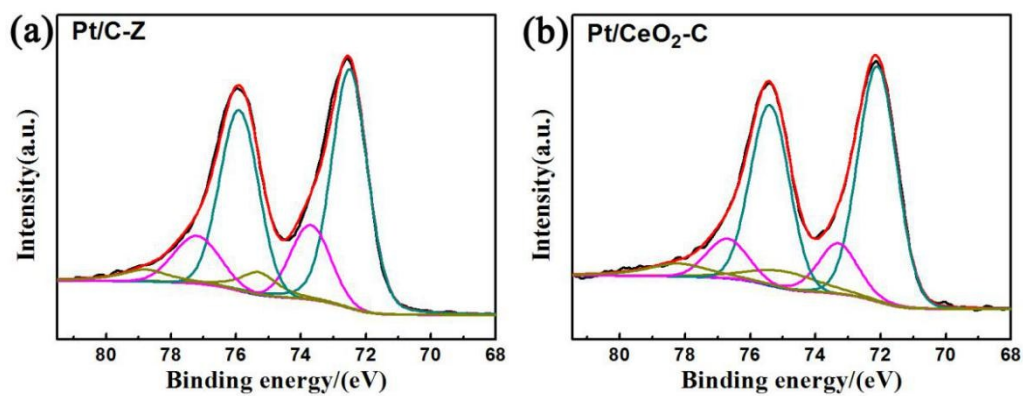

**Fig. S4** Pt 4f XPS spectra of (a) Pt/C-Z; (b) Pt/CeO<sub>2</sub>-C; The black, red, dark cyan, magenta, dark yellow lines represent the raw, the fitted, the Pt<sup>0</sup>, the Pt<sup>2+</sup> and the Pt<sup>4+</sup> components' curves, respectively.

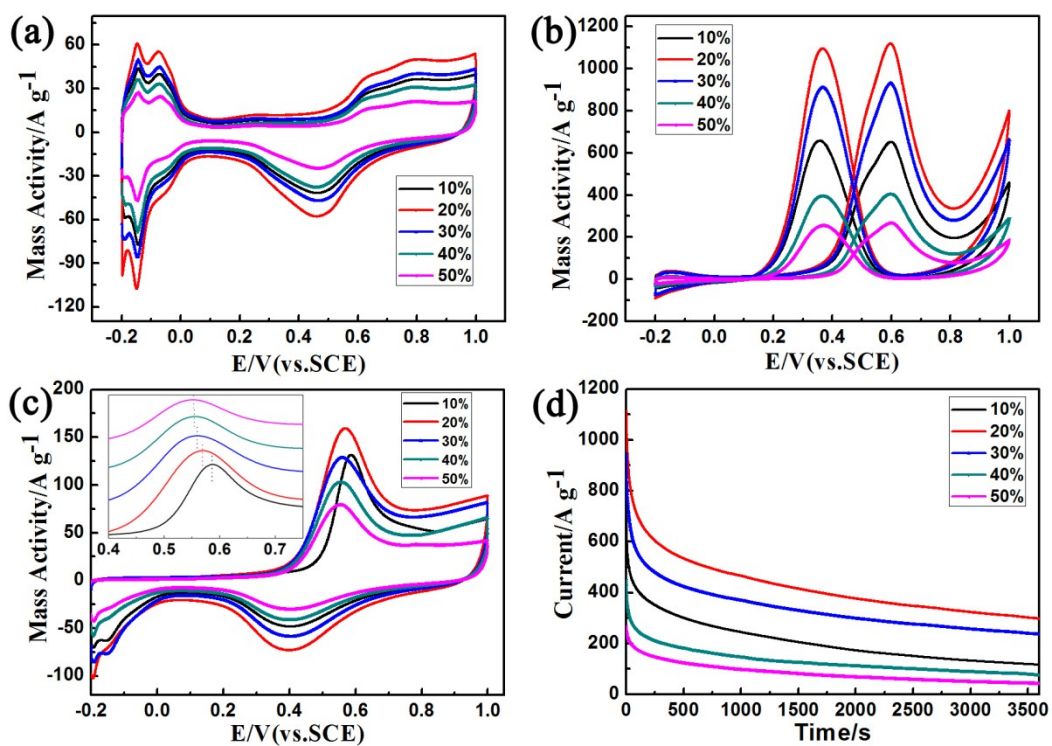

Fig. S5 (a) CV curves of Pt/His-CeO<sub>2</sub>-C with various loadings of His-CeO<sub>2</sub> in 0.5 M H<sub>2</sub>SO<sub>4</sub> at 50 mV s<sup>-1</sup>; (b) Mass activities of MOR recorded in 0.5 M H<sub>2</sub>SO<sub>4</sub> + 1.0 M CH<sub>3</sub>OH at 50 mV s<sup>-1</sup>; (c) CO stripping curves in 0.5 M H<sub>2</sub>SO<sub>4</sub> at 50 mV s<sup>-1</sup> in the first forward scan. Inset: magnified areas in the range of 0.4 ~ 0.75 V. (d) Chronoamperometric curves of the prepared catalysts tested at 0.6 V.

## References

- 1 X. Wang, X. Li, D. Liu, S. Song, H. Zhang, *Chem. Commun.*, 2012, 48, 2885-2887.
- 2 H. Xu, A. L. Wang, Y. X. Tong, G. R. Li, *Acs Catal.*, 2016, 6, 5198-5206.
- 3 Y. Fan, Z. Yang, P. Huang, X. Zhang, Y. M. Liu, *Electrochim. Acta*, 2013, 105, 157-161.
- 4 Z. M. Cui, S. P. Jiang, C. M. Li, *Chem. Commun.*, 2011, 47, 8418-8420.
- 5 A. Nouralishahi, A. A. Khodadadi, Y. Mortazavi, A. Rashidi, M. Choolaei, *Electrochim. Acta*, 2014, 147, 192-200.
- 6 T. H. T. Vu, T. T. T. Tran, H. N. T. Le, L. T. Tran, P. H. T. Nguyen, H. T. Nguyen, N. Q. Bui, *Electrochim. Acta*, 2015, 161, 335-342.
- 7 G. Zhang, Z. Yang, W. Zhang, Y. Wang, *J. Mater. Chem. A*, 2017, 5, 1481-1487.
- 8 Y. Gu, C. Liu, Y. Li, X. Sui, K. Wang, Z. Wang, *J. Power Sources*, 2014, 265, 335-344.
